# Supplementary material for: p38 Mediates Resistance to FGFR Inhibition in Non-Small Cell Lung Cancer
Source: Cells. 2021 Nov 30;10(12):3363. doi: 10.3390/cells10123363 (PMC8699485; doi:10.3390/cells10123363)
Supplement: Supplementary file 1 [file cells-10-03363-s001.zip]

Archive with 16 entries (16 files):
- Supplementary Figure S1.tif
- Supplementary Figure S2.tif
- Supplementary Figure S3.tif
- Supplementary Figure S4A.tiff
- Supplementary Figure S4B.tiff
- Supplementary Figure S4C.tiff
- Supplementary Figure S4D.tiff
- Supplementary Figure S4E.tiff
- Supplementary Figure S4F.tiff
- Supplementary Figure S5.tif
- Supplementary Figure S6.tif
- Supplementary Figure S7.tif
- Supplementary Figure S8.tif
- Supplementary Figure S9.tif
- Supplementary Figures description REVISION.pdf
- Supplementary Materials Figure 3B - high resolution.tif
